# Supplementary figures and images for: Tumor-draining lymph node is important for a robust abscopal effect stimulated by radiotherapy
Source: HighWire-hosted journal article supplement (doi:10.1136/jitc-2020-000867), 2020-10-01

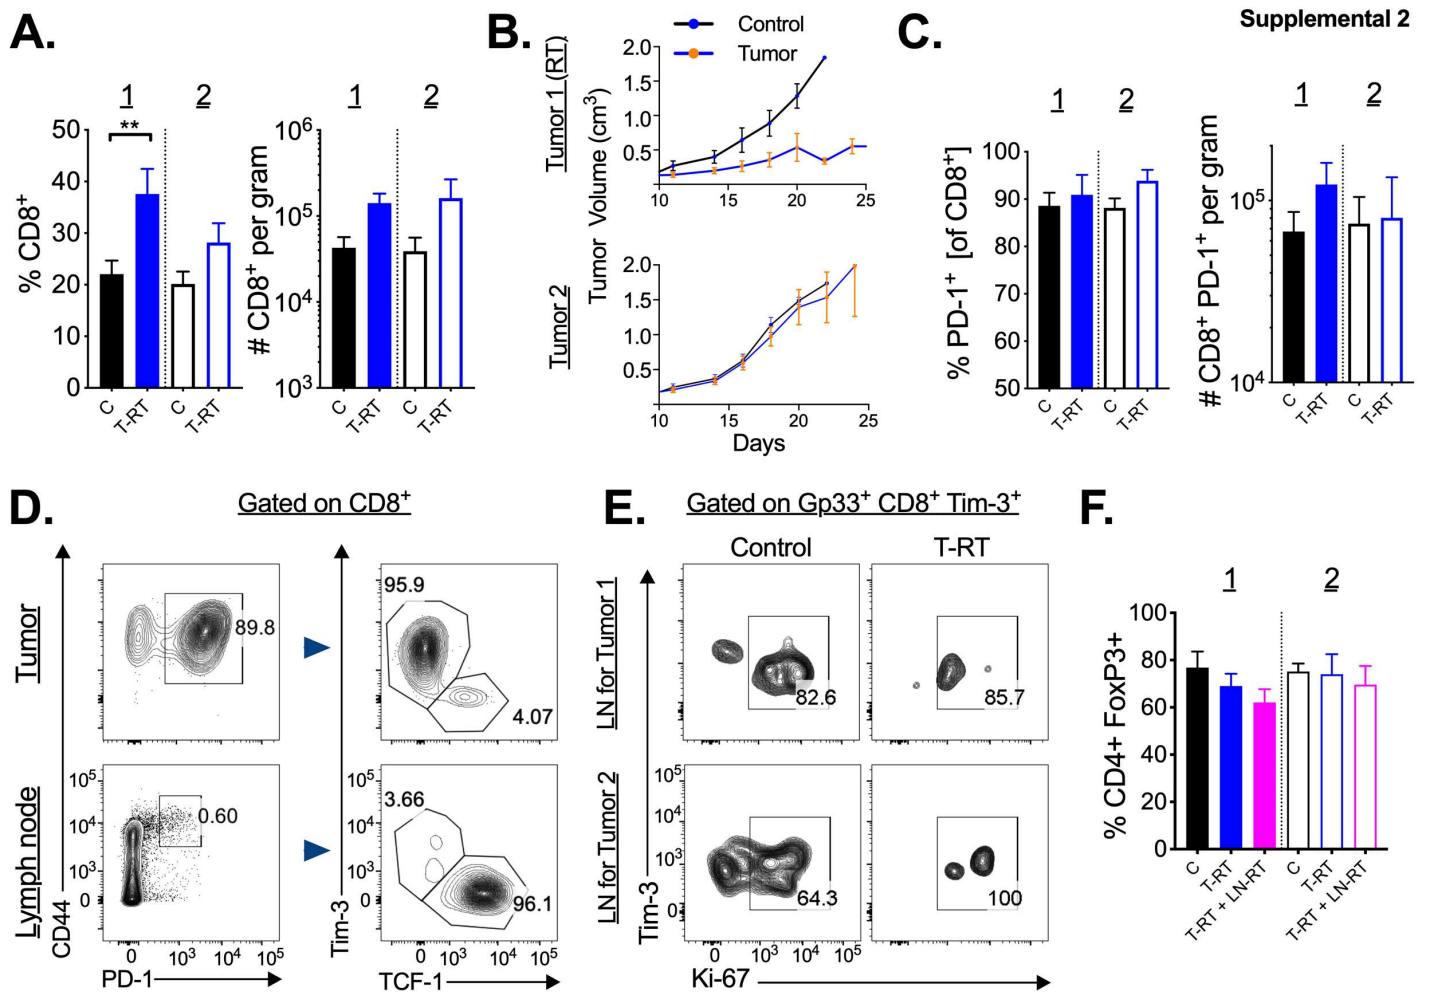

Supplement: jitc-2020-000867supp002_data_supplement.pdf [file jitc-2020-000867supp002_data_supplement.pdf]

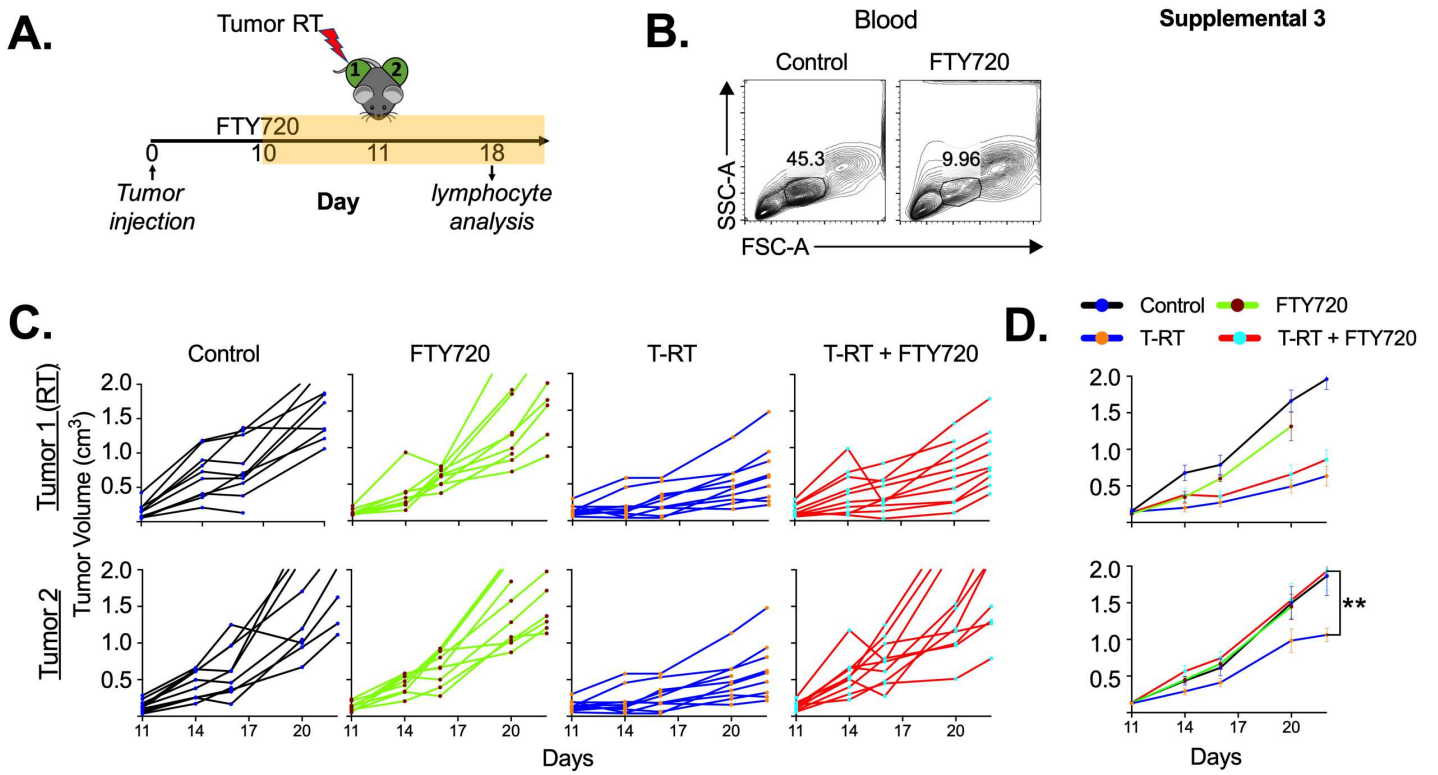

Supplement: jitc-2020-000867supp003_data_supplement.pdf [file jitc-2020-000867supp003_data_supplement.pdf]
